# Supplementary material for: TH2/TH1 Shift Under Ibrutinib Treatment in Chronic Lymphocytic Leukemia
Source: PubMed Central journal article supplement (PMC8082026; doi:10.3389/fonc.2021.637186), 2021-04-15

## Supplementary Material

**Table S1.** Analysis on 208 paired PB samples before and during ibrutinib treatment. **A.** Relative amounts of Th1, Th2 and Th17 cells. **B.** Th2/Th1 ratio and relative amounts of CLL and CD4<sup>+</sup> T cells.

| A.                  | Percentage of Th1 |               |              |               |               |               | Percentage of Th2 |               |              |               |               |               | Percentage of TH17 |               |              |               |               |               |      |
|---------------------|-------------------|---------------|--------------|---------------|---------------|---------------|-------------------|---------------|--------------|---------------|---------------|---------------|--------------------|---------------|--------------|---------------|---------------|---------------|------|
|                     | D0<br>(n=71)      | D14<br>(n=50) | M8<br>(n=30) | M12<br>(n=25) | M18<br>(n=22) | M24<br>(n=10) | D0<br>(n=71)      | D14<br>(n=50) | M8<br>(n=30) | M12<br>(n=25) | M18<br>(n=22) | M24<br>(n=10) | D0<br>(n=71)       | D14<br>(n=50) | M8<br>(n=30) | M12<br>(n=25) | M18<br>(n=22) | M24<br>(n=10) |      |
| Median              | 17.0%             | 21.5%         | 24.0%        | 28.7%         | 27.6%         | 32.1%         | 3.0%              | 2.6%          | 2.3%         | 2.6%          | 2.0%          | 3.2%          | 1.3%               | 1.2%          | 1.0%         | 0.9%          | 1.0%          | 1.8%          |      |
| Interquartile range | 25                | 12.1%         | 15.0%        | 15.8%         | 21.1%         | 21.1%         | 16.1%             | 1.9%          | 1.8%         | 1.6%          | 1.6%          | 1.2%          | 1.6%               | 0.8%          | 0.7%         | 0.5%          | 0.6%          | 0.7%          | 1.1% |
|                     | 75                | 26.2%         | 33.4%        | 35.0%         | 38.8%         | 33.2%         | 45.6%             | 6.2%          | 5.0%         | 3.0%          | 3.7%          | 3.2%          | 5.1%               | 2.3%          | 2.1%         | 1.4%          | 1.8%          | 1.3%          | 2.3% |

| B.                  | Th2/Th1 ratio |               |              |               |               |               | Percentage of CLL cells |               |              |               |               |               | Percentage of CD4 <sup>+</sup> T-cells |               |              |               |               |               |
|---------------------|---------------|---------------|--------------|---------------|---------------|---------------|-------------------------|---------------|--------------|---------------|---------------|---------------|----------------------------------------|---------------|--------------|---------------|---------------|---------------|
|                     | D0<br>(n=71)  | D14<br>(n=50) | M8<br>(n=30) | M12<br>(n=25) | M18<br>(n=22) | M24<br>(n=10) | D0<br>(n=71)            | D14<br>(n=50) | M8<br>(n=30) | M12<br>(n=25) | M18<br>(n=22) | M24<br>(n=10) | D0<br>(n=71)                           | D14<br>(n=50) | M8<br>(n=30) | M12<br>(n=25) | M18<br>(n=22) | M24<br>(n=10) |
| Median              | 0.19          | 0.15          | 0.11         | 0.09          | 0.10          | 0.13          | 94.0%                   | 94.0%         | 25.0%        | 12.0%         | 7.0%          | 15.5%         | 1.8%                                   | 2.3%          | 15.3%        | 22.9%         | 36.7%         | 34.9%         |
| Interquartile range | 25            | 0.11          | 0.06         | 0.07          | 0.06          | 0.08          | 90.0%                   | 89.8%         | 7.6%         | 5.5%          | 1.4%          | 1.2%          | 1.1%                                   | 1.2%          | 6.0%         | 7.9%          | 16.1%         | 5.6%          |
|                     | 75            | 0.41          | 0.26         | 0.16          | 0.14          | 0.13          | 96.0%                   | 97.0%         | 58.5%        | 41.0%         | 22.8%         | 34.0%         | 3.1%                                   | 5.0%          | 36.7%        | 45.4%         | 52.2%         | 46.6%         |

**Table S2.** Analysis on 208 paired PB samples before and during ibrutinib treatment. **A.** Absolute values of Th1, Th2 and Th17 cells. **B.** Absolute values of CLL and CD4<sup>+</sup> T cells.

| A.                  | Th1 cells/ $\mu$ l |               |              |               |               |               | Th2 cells/ $\mu$ l |               |              |               |               |               | Th17 cells/ $\mu$ l |               |              |               |               |               |
|---------------------|--------------------|---------------|--------------|---------------|---------------|---------------|--------------------|---------------|--------------|---------------|---------------|---------------|---------------------|---------------|--------------|---------------|---------------|---------------|
|                     | D0<br>(n=71)       | D14<br>(n=50) | M8<br>(n=30) | M12<br>(n=25) | M18<br>(n=22) | M24<br>(n=10) | D0<br>(n=71)       | D14<br>(n=50) | M8<br>(n=30) | M12<br>(n=25) | M18<br>(n=22) | M24<br>(n=10) | D0<br>(n=71)        | D14<br>(n=50) | M8<br>(n=30) | M12<br>(n=25) | M18<br>(n=22) | M24<br>(n=10) |
| Median              | 192                | 287           | 176          | 216           | 256           | 199           | 31                 | 42            | 20           | 17            | 16            | 22            | 13                  | 16            | 6            | 7             | 9             | 11            |
| Interquartile range | 25                 | 82            | 146          | 119           | 118           | 87            | 18                 | 18            | 12           | 9             | 10            | 10            | 9                   | 8             | 4            | 5             | 4             | 7             |
|                     | 75                 | 383           | 529          | 353           | 358           | 384           | 423                | 60            | 71           | 42            | 34            | 29            | 40                  | 28            | 37           | 16            | 14            | 15            |

| B.                  | CLL cells/ $\mu$ l |               |              |               |               |               | CD4 <sup>+</sup> cells/ $\mu$ l |               |              |               |               |               |      |
|---------------------|--------------------|---------------|--------------|---------------|---------------|---------------|---------------------------------|---------------|--------------|---------------|---------------|---------------|------|
|                     | D0<br>(n=71)       | D14<br>(n=50) | M8<br>(n=30) | M12<br>(n=25) | M18<br>(n=22) | M24<br>(n=10) | D0<br>(n=71)                    | D14<br>(n=50) | M8<br>(n=30) | M12<br>(n=25) | M18<br>(n=22) | M24<br>(n=10) |      |
| Median              | 49058              | 56857         | 3467         | 1248          | 460           | 1218          | 1024                            | 1478          | 801          | 738           | 892           | 827           |      |
| Interquartile range | 25                 | 29025         | 23913        | 493           | 270           | 116           | 134                             | 684           | 860          | 573           | 530           | 583           | 364  |
|                     | 75                 | 91471         | 96419        | 9394          | 4596          | 2160          | 4905                            | 1722          | 1919         | 1393          | 1164          | 1148          | 1080 |

**Table S3.** Correlation analysis between the Th2/Th1 ratio and Th1 or Th2 cells at baseline (A) and after 8 months of ibrutinib treatment (B). Analysis was made by Pearson's correlation test. The values of Th2/Th1 ratio were significantly correlated at baseline and M8 to the Th2 values.

**A.**

|            | D0_Th1             | D0_Th2            | D0_Th2/Th1         |
|------------|--------------------|-------------------|--------------------|
| D0_Th1     | 1.00000            | 0.21233<br>0.2600 | -0.34617<br>0.0609 |
| D0_Th2     | 0.21233<br>0.2600  | 1.00000           | 0.71452<br><.0001  |
| D0_Th2/Th1 | -0.34617<br>0.0609 | 0.71452<br><.0001 | 1.00000            |

**B.**

|            | M8_Th1             | M8_Th2            | M8_Th2/Th1         |
|------------|--------------------|-------------------|--------------------|
| M8_Th1     | 1.00000            | 0.24840<br>0.1856 | -0.23784<br>0.2057 |
| M8_Th2     | 0.24840<br>0.1856  | 1.00000           | 0.83934<br><.0001  |
| M8_Th2/Th1 | -0.23784<br>0.2057 | 0.83934<br><.0001 | 1.00000            |

**Table S4.** Clinico-biologic features of all the evaluated patients and of those with paired samples at D0 and M8 (WT: wild-type).

| Characteristic |               | Overall<br>N (%) | D0+M8<br>n (%) |
|----------------|---------------|------------------|----------------|
|                |               | 71               | 30             |
| Gender         | Male          | 45 (64.3)        | 20 (69.0)      |
|                | Female        | 25 (35.7)        | 9 (31.0)       |
| Binet stage    | A             | 11 (15.5)        | 3 (10.0)       |
|                | B             | 37 (52.1)        | 17 (56.7)      |
|                | C             | 23 (32.4)        | 10 (33.3)      |
| Rai stage      | 0             | 2 (2.8)          | 1 (3.3)        |
|                | I             | 14 (19.7)        | 7 (23.3)       |
|                | II            | 31 (43.7)        | 13 (43.3)      |
|                | III           | 13 (18.3)        | 3 (10.0)       |
|                | IV            | 11 (15.5)        | 6 (20.0)       |
| IGHV           | mutated       | 24 (34.3)        | 11 (36.7)      |
|                | unmutated     | 46 (65.7)        | 19 (63.3)      |
| TP53           | WT            | 57 (80.3)        | 25 (83.3)      |
|                | mutated       | 14 (19.7)        | 5 (16.7)       |
| FISH           | 13q-          | 22 (31.0)        | 7 (23.3)       |
|                | +12           | 15 (21.1)        | 5 (16.7)       |
|                | 11q-          | 7 (9.9)          | 5 (16.7)       |
|                | 17p-          | 7 (9.9)          | 2 (6.7)        |
|                | No aberration | 20 (28.2)        | 11 (36.7)      |
| NOTCH1         | WT            | 50 (80.6)        | 20 (80.0)      |
|                | Mutated       | 12 (19.4)        | 5 (20.0)       |
| SF3B1          | WT            | 53 (85.5)        | 23 (92.0)      |
|                | mutated       | 9 (14.5)         | 2 (8.0)        |
| BIRC3          | WT            | 57 (91.9)        | 21 (84.0)      |
|                | mutated       | 5 (8.1)          | 4 (16.0)       |

**Table S5.** Modulation of Th2/Th1 ratio and clinical response to ibrutinib.

|                             | Stratified by CR |                      |                      | p            |
|-----------------------------|------------------|----------------------|----------------------|--------------|
|                             |                  | NO CR                | CR                   |              |
| n                           |                  | 53                   | 13                   |              |
| sex (%)                     | M                | 37 (69.8)            | 6 (46.2)             | 0.201        |
|                             | F                | 16 (30.2)            | 7 (53.8)             |              |
| age (median [range])        |                  | 72.21 [37.19, 86.65] | 72.37 [57.39, 81.24] | 0.600        |
| D0_Th2/Th1 (Median [Range]) |                  | 0.20 [0.04, 2.59]    | 0.14 [0.02, 2.02]    | <b>0.050</b> |
| M8_Th2/Th1 (Median [Range]) |                  | 0.12 [0.02, 0.38]    | 0.06 [0.01, 0.09]    | <b>0.023</b> |

**Table S6.** Clinical response to ibrutinib according to the 0.088 cut-off of Th2/Th1 ratio at M8.

|                               | level | M8 Th2/Th1 ratio  |                   | p            |
|-------------------------------|-------|-------------------|-------------------|--------------|
|                               |       | Th2/Th1 <0.088    | Th2/Th1 >0.088    |              |
| n                             |       | 10                | 20                |              |
| M8_CLL cells (median [range]) |       | 0.15 [0.00, 0.30] | 0.34 [0.00, 0.94] | <b>0.025</b> |
| CR (%)                        | NO CR | 6 (60.0)          | 19 (100.0)        | <b>0.016</b> |
|                               | CR    | 4 (40.0)          | 0 (0.0)           |              |

**Figure S1.** CD4<sup>+</sup>T cells, Th2/Th1/Th17 cells and Th2/Th1 ratio in paired PB samples before and during ibrutinib treatment. Intra-individual variations are expressed as percentages. Samples at D0, n=71; at D14, n=50; at M8, n=30; at M12, n=25; at M18, n=22; at M24, n=10. \*p<0.05.

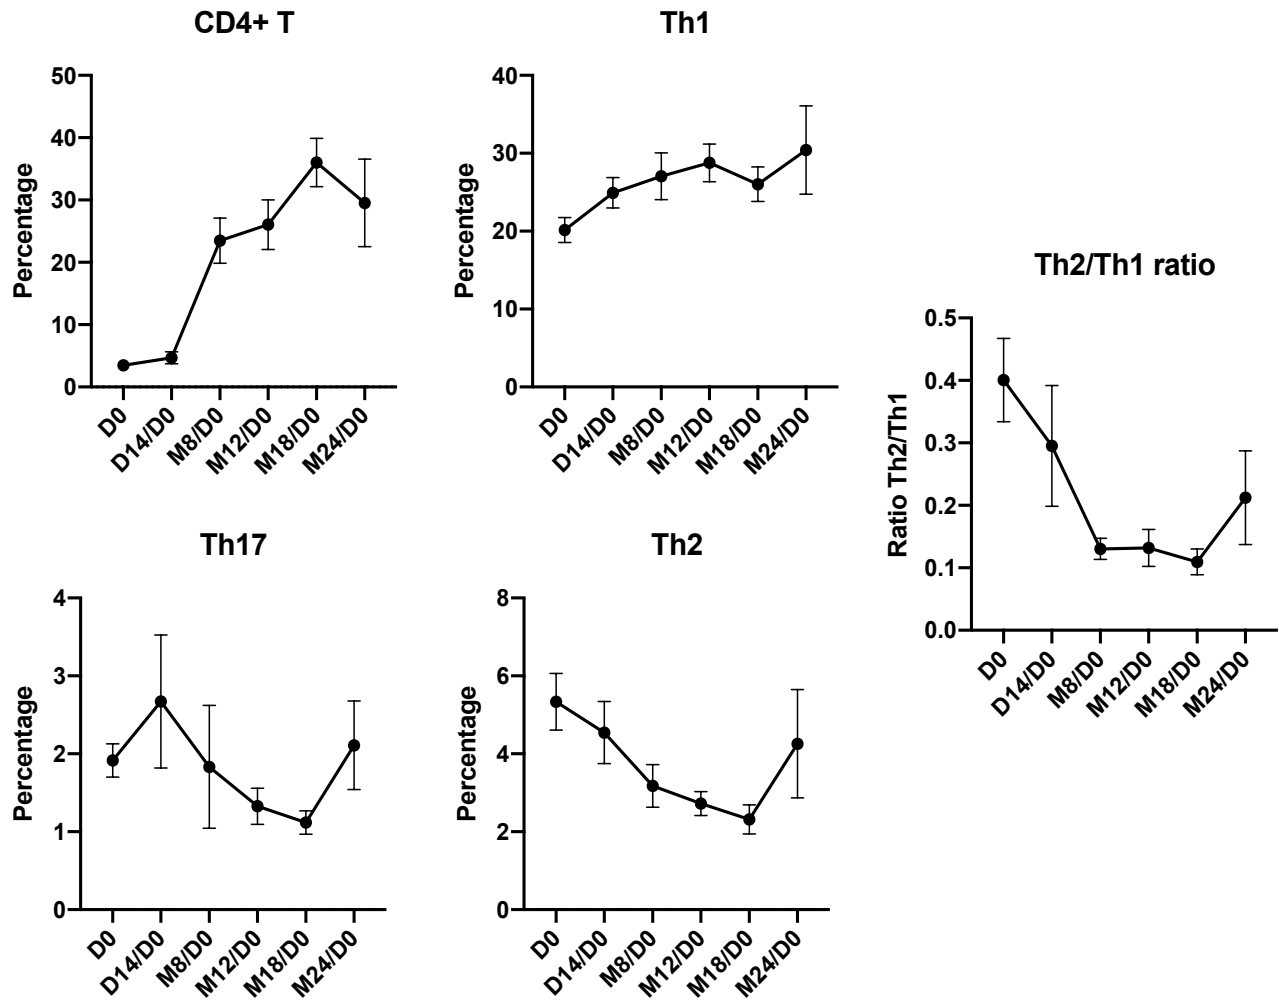

**Figure S2.** CD4<sup>+</sup> T cells and Th1/Th1/Th17 cells in paired PB samples before and during ibrutinib treatment. Intra-individual variations are expressed as absolute values. Samples at D0, n=71; at D14, n=50; at M8, n=30; at M12, n=25; at M18, n=22; at M24, n=10.

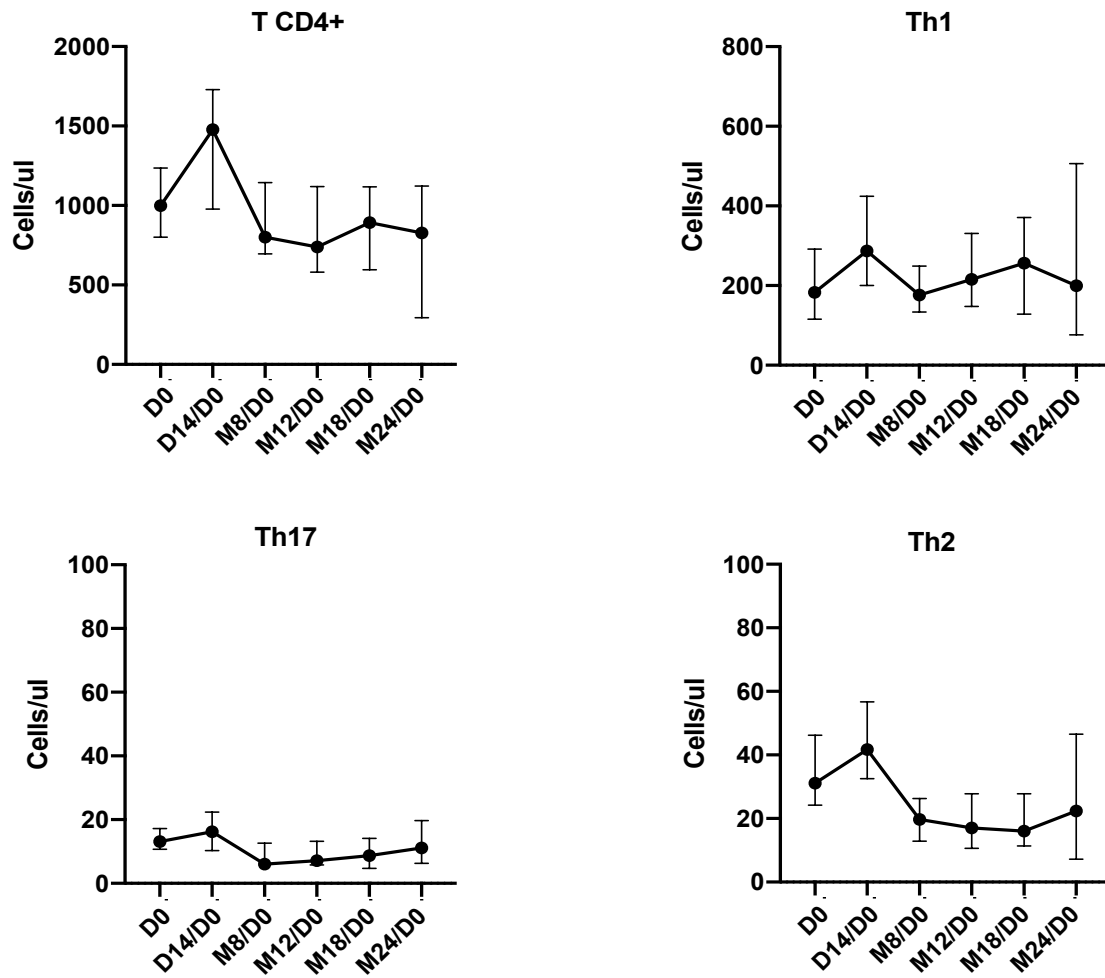

Supplement: DataSheet_1.pdf [file DataSheet_1.pdf]
